# Supplementary material
Source: PubMed Central journal article supplement (PMC2098852)

## Supplementary figure 1

**Supplementary figure 1. piRNA clusters in the mouse genome.** The location of piRNA clusters in the mouse genome are indicated by data source: orange lines for dataset C, magenta triangles on the left for dataset B and green triangles on the right for dataset A. There are roughly 115 clusters ranging from 1-127 kb restricted primarily to autosomes. There is good agreement of cluster positions between the datasets and the majority of the clusters overlap in >75% of their length suggesting that most of the piRNA clusters in the mouse genome are identified.

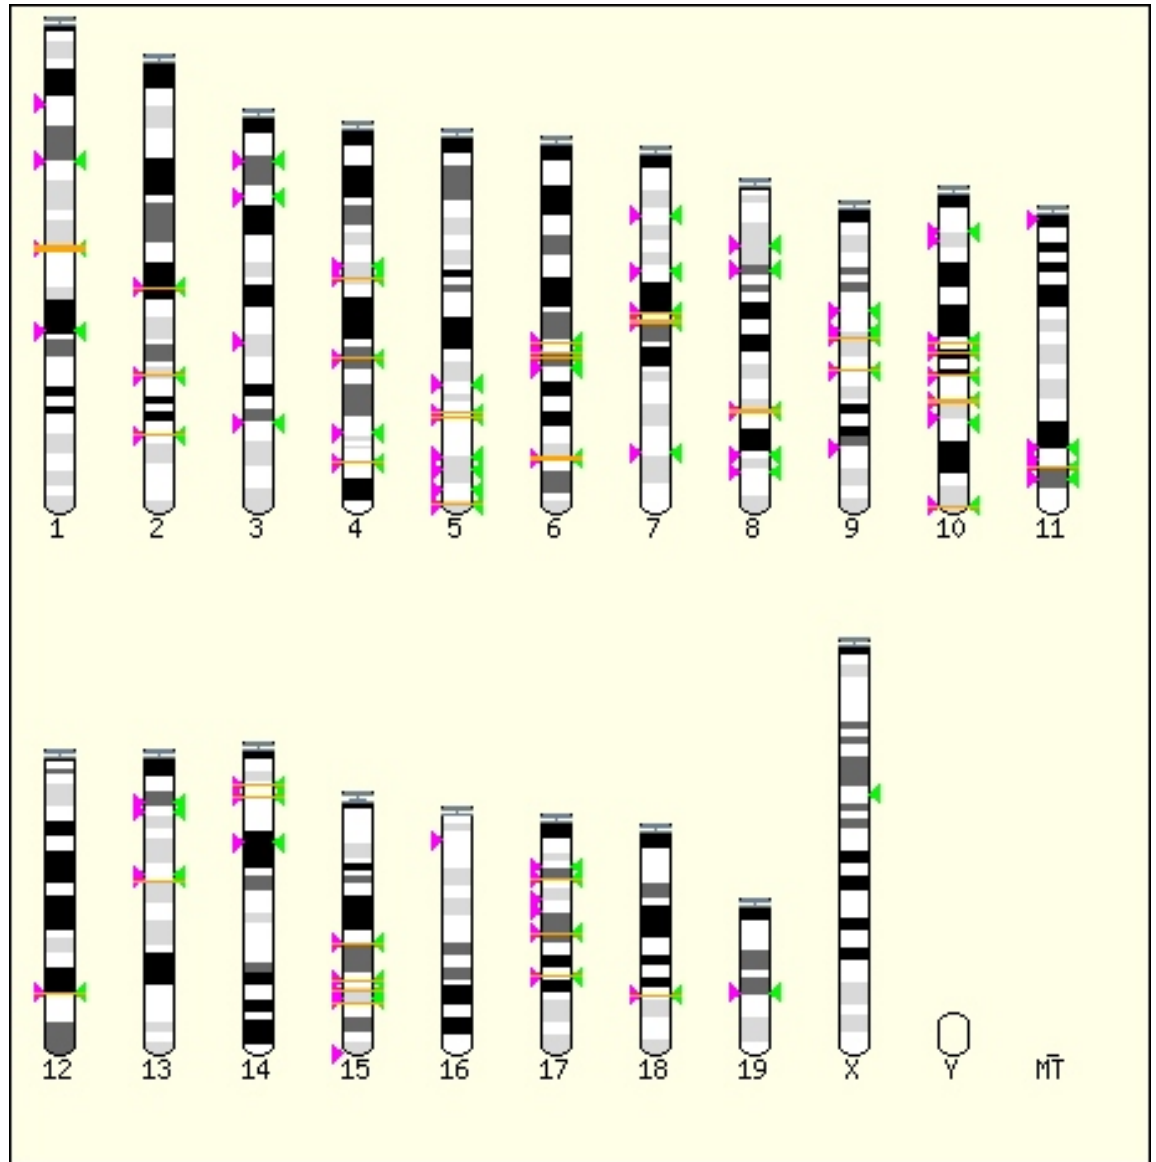

Supplement: pcbi.0030222.sg001.pdf [file pcbi.0030222.sg001.pdf]
