# Supplementary material
Source: PubMed Central journal article supplement (PMC2098852)
Supplement: pcbi.0030222.sg003.pdf [file pcbi.0030222.sg003.pdf]

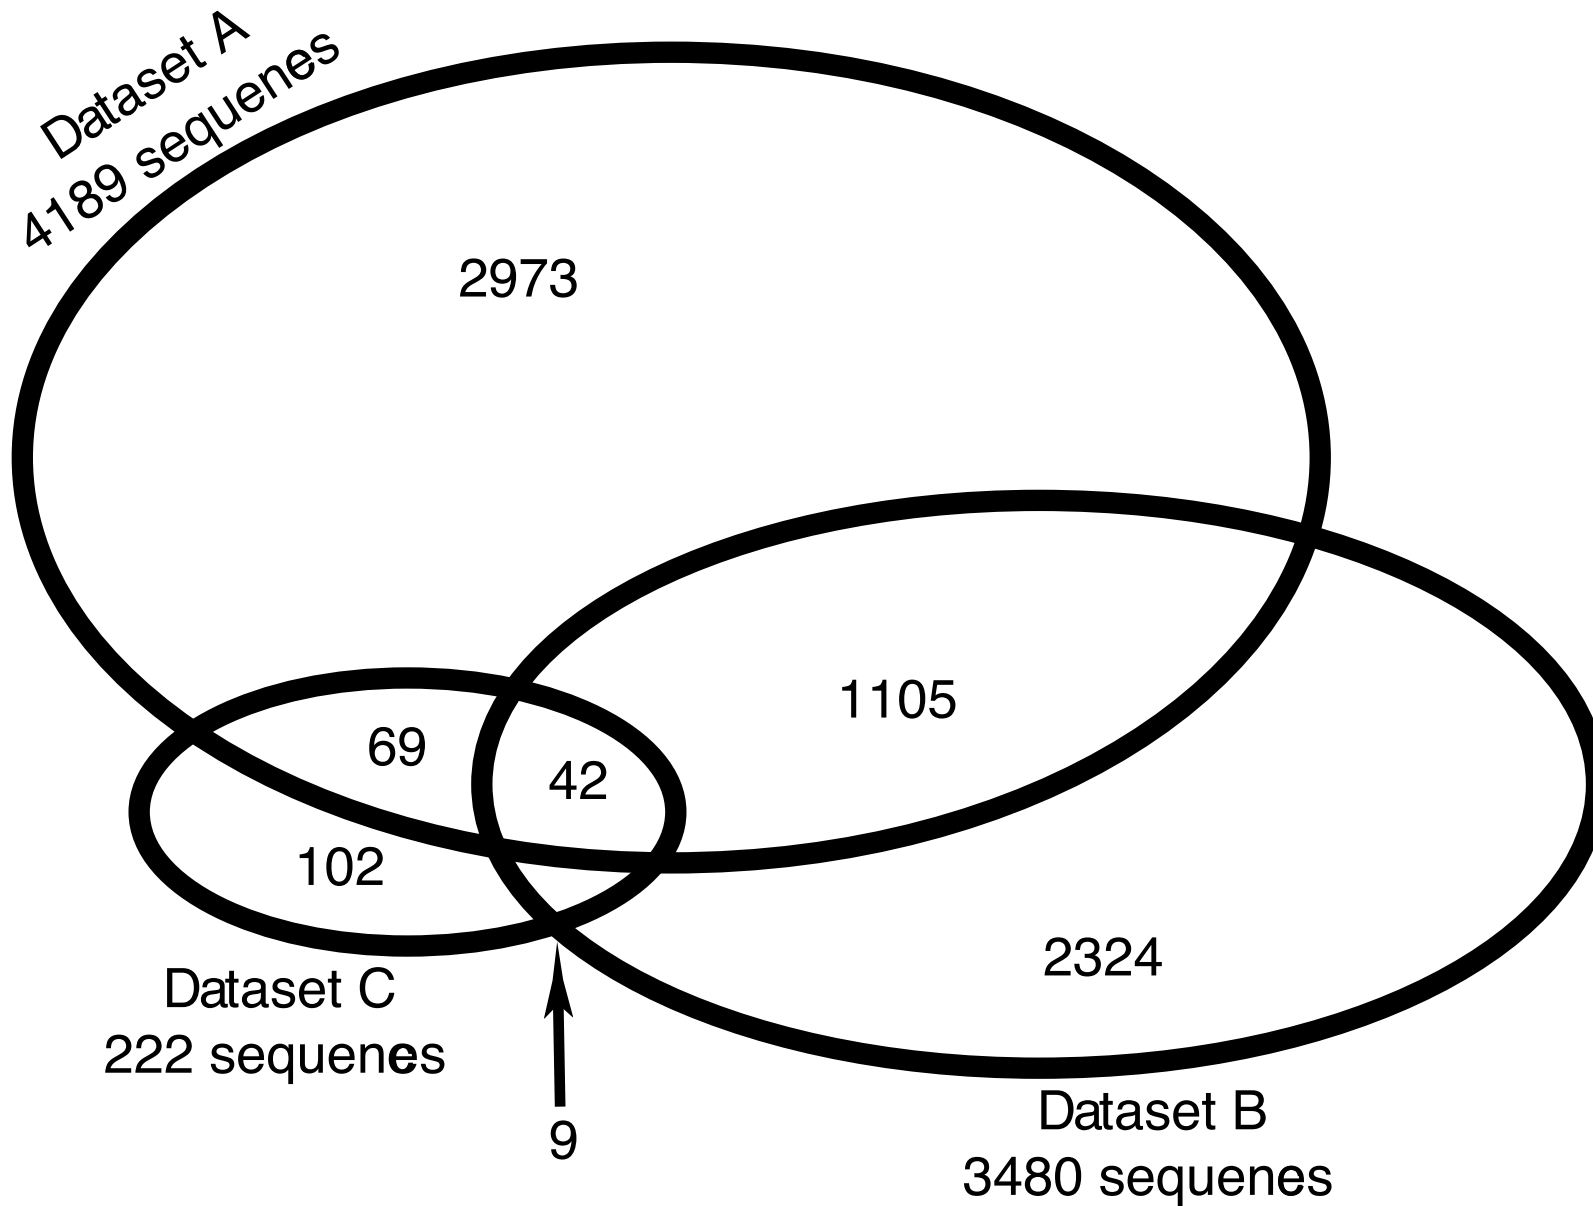

**Supplementary figure 3. Sequence overlap of abundant piRNAs.** Venn diagram of overlap between the datasets using piRNA sequences that were cloned three or more times. Sequences similarity was determined by a 95% identity measure. The degree of overlap is similar to the general piRNA population (Fig. 1) suggesting that the abundant piRNAs from different datasets do not originate from the same genomic locations.
